# Supplementary material for: The pseudo-mitochondrial genome influences mistakes in heteroplasmy interpretation
Source: PubMed Central journal article supplement (PMC1538596; doi:10.1186/1471-2164-7-185), 2006-07-21
Supplement: 1471-2164-7-185-S1.pdf [file 1471-2164-7-185-S1.pdf]

**>CHR 1 NT\_077913.2 46636-47188**

GGAAGGAATCGAACCCCCCAAAGCTGGTTTCAAGCCAACCCCATGGCCTCCATGAC  
TTTTTCAAAAAGATATTAGAAAAACCATTTTCATAACTTTGTCAAAGTTAAATTATAG  
GCTAAATCCTATATATCTTAATGGCACATGCAGCGCAAGTAGGTCTACAAGACGCTA  
CTTCCCCTATCATAGAAGAGCTTATCATCTTTCATGATCACGCCCTCATAATCATT  
CCTTATCTGCTTCCCTAGTCCTGTACGCCCTTTTCCCTAACACTCACAACAAAAC  
AATACTAACATCTCAGACGCTCAGGAAATAGAAACCGTCTGAACTATCCTGCCCGC  
ATCATCCTAGTCCTTATCGCCCTCCCATCCCTACGCATCCTTTACATAACAGACGAG  
GTCAACGATCCCTCCTTTACCATCAAATCAATTGGCCATCAATGGTACTGAACCTAC  
GAATACACCGACTACGGCGGACTAATCTTCAACTCCTACATACTTCCCCATTATTC  
CTAGAACCAGGCGACCTGCGACTCCTTGACGTTGACAAT

**>CHR 1 NT\_077913.2 47036-47595**

GTCAACGATCCCTCCTTTACCATCAAATCAATTGGCCATCAATGGTACTGAACCTAC  
GAATACACCGACTACGGCGGACTAATCTTCAACTCCTACATACTTCCCCATTATTC  
CTAGAACCAGGCGACCTGCGACTCCTTGACGTTGACAATCGAGTAGTACTCCCGGTT  
GAAGCCCCATTTCGTATAATAATTACATCACAAGACGTCTTACACTCATGAGCTGTC  
CCCACATTAGGCTTAAAAACAGATGCAATTCCCGGACGTCTAAACCAAACCACTTTC  
ACTGCTACACGACCAGGGGTATACTACGGCCAATGCTCTGAAATCTGTGGAGCAA  
CCAGTTTTATGCCCATCGTCCTAGAATTAATTCCCCTAAAAATCTTTGAAATAGGGC  
CCGTATTTACCCTATAGCACCCCCTCTACCCCCTCTAGAGCCCACTGTAAAGCTAAC  
TTAGCATTAACCTTTTAAAGTTAAAGATTAAGAGAACCAACACCTCTTTACAGTGAAA  
TGCCCCAACTAAATACTACCGTATGACCCACCATAATTACCCCATACTCCTTACAC  
TATTCCTCATCACCCAACA

**>CHR 1 NT\_077913.2 47617-48122**

CCAATAAAAATATTAATAACAAATTACCACCTACCTCCCTCACCAAAGCCCATAAAA  
AATAAAAAACTATAACAAACCCTGAGAACCAAATGAACGAAAATCTGTTCACTTC  
ATTCATTGCCCCCAATCCTAGGCCTACCCGCCGCAGTACTGATCATTCTATTTCCC  
CCTCTATTGATCCCCACCTCCAAATATCTCATCAACAACCGACTAATTACCACCCAA  
CAATGACTAATCCAATAACCTCAAAACAAATGATAGCCATACACAACACTAAGGG  
ACGAACCTGATCTCTTATACTAGTATCCTTAATCATTTTTATTGCCACAACCTACCTC  
CTCGGACTCCTGCCTCACTCATTACACCAACCACCCAACCTATCTATAAACCTAGCC  
ATGGCCATCCCCTTATGAGCGGGCGCAGTGATTATAGGCTTTCGCTCTAAGATTA  
AATGCCCTAGCCCACTTCTTACCACAAGGCACACCTACACCCCTTATCC

**>CHR 1 NT\_077913.2 47995-48594**

CCAATACTATAAACCTAGCCATGGCCATCCCCTTATGAGCGGGCGCAGTGATTAT  
AGGCTTTCGCTCTAAGATTA AAAATGCCCTAGCCCACTTCTTACCACAAGGCACACC  
TACACCCCTTATCCCTATACTAGTTATTATCGAAACCATCAGCCTACTCATTCAACCA  
ATAGCCCTGGCCGTACGCCTAACCGCTAACATTACTGCAGGCCACCTACTCATGCAC  
CTAATTGGAAGCGCCACACTAGCAATATCAACTATTAACCTTCCCTCTACACTTATC  
ATCTTCACAATTCTAATTCTACTGACTATCCTAGAAATCGCTGTGCGCTTAATCCAAG  
CCTACGTTTTTACACTTCTAGTAAGCCTCTACCTGCACGACAACACATAATGACCCA  
CCAATCACATGCCTATCATATAGTAAAACCCAGCCCATGGCCCCTAACAGGGGCCCT  
CTCAGCCCTCCTAATGACCTCCGGCCTAGCCATGTGATTTCCTTCCACTCCACAACC

CTCCTCATACTAGGCCTACTAACCAACACACTAACCATATACCAATGATGGCGCGAT  
GTAACACGAGAAAGCACATACCAAGGCAAGCCGAATTCCAGC

**>CHR 1 NT\_077913.2 43543-44192**

AATCCAAAATTCTCCGTGCCACCTATCACACCCCATCCTAAAGTAAGGTCAGCTAAA  
TAAGCTATCGGGCCCATACCCCGAAAATGTTGGTTATATCCTTCCCGTACTAATTAA  
TCCCCTGGCCCAACCCGTCATCTACTCTACCATCTTTGCAGGCACACTCATCACAGC  
GCTAAGCTCGCACTGATTTTTTACCTGAGTAGGCCTAGAAATAAACATGCTAGCTTT  
TATCCAGTTCTAACCAAAAAAATAAACCCCTCGTTCCACAGAAGCTGCCATCAAGTA  
TTTCCTCACGCAAGCAACCGCATCCATAATCCTTCTAATAGCTATCCTCTTCAACAAT  
ATACTCTCCGGACAATGAACCATAACCAATACCACCAATCAATACTCATCATTATA  
ATCATAATGGCTATAGCAATAAACTAGGAATAGCCCCCTTTCACTTCTGAGTCCCA  
GAGGTTACCCAAGGCACCCCTCTGACATCCGGCCTGCTCCTTCTCACATGACAAAA  
CTAGCCCCCATCTCAATCATATACCAAATTTCTCCCTCATTAACGTAAGCCTTCTCC  
TCACTCTTTCAATCTTATCCATCATGGCAGGCAGTTGAGGTGGATTAAACCAAACCC  
AACTACGCAAAATCTTAGCAT

**>CHR 1 NT\_077913.2 44048-44736**

TGACAAAACTAGCCCCATCTCAATCATATACCAAATTTCTCCCTCATTAACGTA  
AGCCTTCTCCTCACTCTTTCAATCTTATCCGTCATGGCAGGCAGTTGAGGTGGATTAA  
ACCAAACCCAACTACGCAAAATCTTAGCATACTCCTCAATTACCCACATAGGATGAA  
TAACAGCAGTTCTACCGTACAACCCTAACATAACCATTCTTAATTTAACTATTTATAT  
TATCCTAACTACTACCGCATTCTACTACTCAACTTAACTCCAGCACCACAACCCT  
ACTACTATCTCGCACCTGAAACAAGCTAACATGACTAACACCCTTAATTCCATCCAC  
CCTCCTCTCCCTAGGAGGCCTGCCCCCGCTAACCGGCTTTTTGCCCAAATGGGGCCAT  
TATCGAAGAATTCACAAAAACAATAGCCTCATCATCCCCACCATCATAGCCATCAT  
CACCTCCTTAACCTCTACTTCTACCTGCGCCTAATCTACTCCACCTCAATCACACTA  
CTCCCTATATCTAACAAACGTA AAAAATAAAATGACAGTTTGAACACACAAAACCCAC  
CCCATTCTCCCCACACTCATCGCCCTTACCACACTGCTCCTACCTATCTCCCCTTTT  
ATGCTAATAATCTTATAGAAATTTAGGTAAATACAGACCAAGAGCCTTCAAAGCCC  
TCAGTAAGTTGCAATACTTAATTTCTGCAACAGCTAAGGACTGCAAAACCCCACTCT  
GCATCAACTGAACGCAAATC

**>CHR 1 NT\_077913.2 44693-45303**

TAGAAATTTAGGTAAATACAGACCAAGAGCCTTCAAAGCCCTCAGTAAGTTGCAAT  
ACTTAATTTCTGCAACAGCTAAGGACTGCAAAACCCCACTCTGCATCAACTGAACGC  
AAATCAGCCACTTTAATTAAGCTAAGCCCTTACTAGACCAATGGGACTTAAACCCAC  
AAACTTTAGTTAACAGCTAAGCACCCTAATCAACTGGCTTCAATCTACTTCTCCCG  
CCGCCGGGAAAAAAGGCGGGGAGAAGCCCCGGCAGGTTTGAAGCTGCTTCTTCGAAT  
TTGCAATTCAATATGAAAATCACCTCAGAGCTGGTAAAAAGAGGCTTAACCCCTGTC  
TTTAGATTTACAGTCCAATGCTTCACTCAGCCATTTTACCTACCCCACTGATGTTT  
GCCGACCGTTGACTATTCTCTACAAACCACAAAGACATTGGAACACTATACTTATA  
TTCGGCGCATGAGCTGGAGTCCTAGGCACAGCTCTAAGCCTCCTTATTCGAGCCGAA  
CTGGGCCAGCCAGGCAACCTTCTAGGTAACGACCACATCTACAACGTTATCGTCACA  
GCCCATGCATTTGTAATAATCTTCTTCATAGTAATACCCA

**>CHR 1 NT\_077913.2 45074-45663**

TCACCCCACTGATGTTCCGCCGACCGTTGACTATTCTCTACAAACCACAAAGACATT  
 GGAACACTATACCTATTATTCGGCGCATGAGCTGGAGTCCTAGGCACAGCTCTAAGC  
 CTCCTTATTCGAGCCGAACCTGGGCCAGCCAGGCAACCTTCTAGGTAACGACCACATC  
 TACAACGTTATCGTACAGCCCATGCATTTGTAATAATCTTCTTCATAGTAATACCCA  
 TCATAATCGGAGGCTTTGGCAACTGACTAGTTCCTTAATAATCGGTGCCCCCGATA  
 TGGCGTTTCCCCGCATAAACAACATAAAGCTTCTGACTCTTACCCCCCTCTCTCCTACT  
 CCTGCTTGCATCTGCTATAGTGGAGGCCGGCGCAGGAACAGGTTGAACAGTCTACCC  
 TCCCTTGGCAGGGAACACTCCCACCCTGGAGCCTCCGTAGACCTAACCATCTTCTC  
 CTTACACCTAGCAGGTATCTCCTCTATCTTAGGAGCCATCAATTCATCACAACAATT  
 ATTAATATAAAACCCCTGCCATAACCCAATACCAAACGCCCCCTTTCGTCTGATCC  
 GTCCTAATCACAGCAGT

**>CHR 1 NT\_077913.2 45623-46239**

CAAACGCCCTTTTCGTCTGATCCGTCCTAATCACAGCAGTCTTACTTCTCCTATCTC  
 TCCAGTCCTAGCCGCTGGCATCACTATACTACTAACAGACCGTAACCTCAACACCA  
 CCTTCTTCGACCCAGCCGGAGGAGACCCCATCTATACCAACACCTATTCTGAT  
 TTTTCGGTCACCCTGAAGTTTATTTCTCATCCTACCAGGCTTCGGAATAATCTCCCA  
 TATTGTAACCTACTACTCCGGAAAAAAGAACCATTTGGATACATAGGTATGGTCTG  
 AGCTATGATATCAATTGGCTTCCTAGGGTTTATCGTGTGAGCACACCATATATTTAC  
 AGTAGGAATAGACGTAGACACACGAGCATATTTACCTCCGCTACCATAATCATCGC  
 TATCCCCACCGGCGTCAAAGTATTTAGCTGACTCGCCACACTCCACGGAAGCAATAT  
 GAAATGATCTGCTGCAGTGCTCTGAGCCCTAGGATTTATTTTTCTTTTCACCGTAGGT  
 GGCTGACTGGCATTGTATTAGCAAACCTCATCACTAGACATCGTACTACACGACACG  
 TACTACGTTGTAGCCCACTTCCACTATGTCCTATCAATAGGAG

**>CHR 1 NT\_077913.2 46097-46704**

AGTGCTCTGAGCCCTAGGATTTATTTTTCTTTTCACCGTAGGTGGCCTGACTGGCATT  
 GTATTAGCAAACCTCATCACTAGACATCGTACTACACGACACGTACTACGTTGTAGCC  
 CACTTCCACTATGTCCTATCAATAGGAGCTGTATTTGCCATCATAGGAGGCTTCATTC  
 ACTGATTTCCCCTATTCTCAGGCTACACCCTAGACCAAACCTACGCCAAAATCCATT  
 TCGCTATCATATTCATCGGCGTAAATCTAACTTTCTTCCCACAACACTTTCTCGGCCT  
 ATCCGGAATGCCCCGACGTTACTCGGACTATCCCGATGCATACACCACATGAAATAT  
 CCTATCATCTGTAGGCTCATTCATTTCTCTAACAGCAGTAATATTAATAATTTTCATA  
 ATTTGAGAAGCCTTCGCTTCGAAGCGAAAAGTCCTAATAGTAGAAGAACCCTCCATA  
 AACCTGGAGTGACTATATGGATGCCCCCACCCTACCACACATTCGAAGAACCCGTA  
 TACATAAAATCTAGACAAAAAAGGAAGGAATCGAACCCCCCAAAGCTGGTTTCAAG  
 CCAACCCCATGGCCTCCATGACTTTTTCAAAAAGA

**>CHR 2 NT\_005058.14 9588111-9587524**

TTGCATAAAACTTAAACTTTATAATCTGAGGTTCAACTCCTCTTAACATACCTATAA  
 TTAACCTTCTCCTACTTATTGTCCCCACTCTAATCGCTATAGCATTCCCTTACACTCTTT  
 GAATGAAAATCTTAGGCTATATACTACGCAAAGGACATAACATCATGGGCC  
 CTATGGACTGCTCCACCATTCGCTGATGCAATAAACTTTTTACCAAAGAACCATTA  
 TGGCCCTAACATCTAATATTACCCTCTATATTGCTCCAACCCTGGCCCTCTCCT  
 TTTGTGAACCCCTGCCTATACCAGATCCCCTAATTTAGGCCTATTTATATTAGCCA

CATCAAGCTTAGCTGTCTATTCTATTTTATGGTCAGAATGAGCATCCAATTCAAATTA  
 TGCATAATAGGCACATTACGAGCTGTAGCCAGACAATTCATATGAGGTCACCCT  
 AGCCATTATTCTGTTATCAGTTCTACTAATAAGTGGCTCACTTAACTTGTACAAACTC  
 ATCACAACACAAGAATTTCTCTGACTGCTCCTATCATCATGGCCCCTAGCCATAATA  
 TGATTTACCTCT

**>CHR 2 NT\_005403.15 62851661-62852120**

TGAAAGAAATTAGCATGGTTGACACCTATAATTCCACTAATTCCACTATCCCTACGA  
 GGTTTACCCCCATTACAGGGTTCCTGCCTAAATGAATCATCATCCAAGGATTTACAA  
 AAAATTATAGCCTTGGCACCCCAACCATTATAGCTATCATAACCCTACTCAACCTGT  
 ACTCTTACATACACCTCATTTATTCCATCTTGGTAACTACTTCCCCACATCTAATAA  
 TATGAACTAAAATGACAATTCGAAATCGAAAACCCACACTACTCCCTCCTCACTT  
 GTCATCTCTTCTACCGTCCTCTTACCCACCTCTCCATTAATACTAACTATAACTTAGA  
 AATTTAGTTTAAATAAGACCAAGGGCCTTCAAAGCCCTTAGTAAGTAAATGACACTT  
 AATTTCTGTAACAGACCTAAGGGCTGCAAGACTCTATTCTGCATCAGTTGAACGCAA  
 ATCAGC

**>CHR 3 NT\_005612.14 2831958-2831284**

AGAGCACACCCGTCTATGTAGCAAAATAGTGGGAAGATTCGTAGGTAGAGGCGGCA  
 AACCTACCGAGTCTGGTGATAGCTGGTTGTCCAAGACAGAATCTTAGTTCAACTTTA  
 AATTTACCCACAGAACCCTCCAAATCCCCCTGTAAATTTAACTGTTAGTCCAAAGAG  
 GAACAGCTCTTTGGACACTAGGAAAAACCTTGTAAAGAGAGTAAAAAATTTAATA  
 CCCATAGTAGGCCTAAAAGCAGCCACCAATTAAGAAAGCGTTCAAGCTCAACACCC  
 ATCGTCTAAAAAATCCCAAACATACAACTGAGCTCCTTGCACTCAATTGGACCAATC  
 TATTACCTTATAGAAGAATAATGTTAGTATAAGTAACATGAAAACATTCTCCTCCG  
 CATAAGCCTACATCAGACCAAATATTAAACTGACAATTAACAGCCCAATATCTACA  
 ATCAACCAACAAGCCATTATTACCCTCACTGTTAACCCAACACAGGCATGCCACAA  
 GGAAAGGTTAAAAAAGTAAAAGGAACTCGGCAAATCTTACCCCGCCTGTTTACCA  
 AAAACATCACCTCTAGCATTATCAGTATTAGAGGCACCGCCTGCCCGGTGACATATG  
 TTTAACGGCCGCGGTACCCTAACCGTGCAAAGGTAGCATAATCACTTGTTC

**>CHR 3 NT\_005612.14 2832399-2832340**

CCTCAAGTATACTTCAAAGGATATTTAACTAAAACCCCTACGCATTTATATAGAGGA  
 AACAAGTCGTAACATGGTAAGTGTAGTGGAAAGTGCCTTGGACGAACCAGAGTGT  
 AGCTTAACATAAAGCACCCAACTTACACTTAGGAGATTTCAACTCAACTTGACCACT  
 CTGAGCCAAACCTAGCCCTAAACCCGTTCCACCTTACTACCAAATAACCTTAACCAA  
 ACCATTTACCCAAATAAAGTATAGGCGATAGAAATTGTAAACCGGCGCAATAGATA  
 TAGTACCGCAAGGGAAAGATGAAAAATTATAACCAAGCATAATACAGCAAGGACTA  
 ACCCTGTACCTTTTGCATAATGAATTAAGTAAATAACTTTGCAAAGAGAACCAA  
 AGCTAAGGCCCCCGAAACCAGACGAGCTACCTAAGAACAGCTAAAAGAGCACACCC  
 GTCTATGTAGCAAAATAGTGGGAAGATTTATAGGTAGAGGCGACAAACCTATCGAG  
 CCTGGTGATAGCTGGTTGTCCAAGATAGAATCTTAGTTCAACTTT

**>CHR 4 NT\_016354.17 80880160-80879559**

TTGCATAAACTTAAAATTTTATAATCAGAGGTTCAACTCCTCTTCTTAACAATATGG  
 CTATAATTAACCTTCTCCTACTTATTATCCCCACTCTTATTGCTATAGCATTCTTACA

CTCATCGAATGAAAAATCTTAGGCTATACACA ACTATGCAAAGGACCCAAAATTGT  
 AGGTCCTATGGGCTGCTTCAGCCATTCGCTGATGGAATAAACTTTTCACCAAAGA  
 ACCCTTATGGCCCTCAACATCCACTATTACCCTTTATGTTACTGCTTCAACACTAGCC  
 CTTTCCATTGCTCTCCTTTTATGAACTCCCCTGCCTATACCAGATCGTCTAATTAATTT  
 TAATATAGGCCTCCTATTTATACTAGCAACATCAAGCCAGGCTGTCTACTCTATGAT  
 CAGAATGAGCATCTAATTCAAATATGCACTGATCAGTGCATTACCAGCTGTGGCCC  
 AGACAATTTTCATATAAGGTCACCCTAGCCATTATCCTGCTATCAGTTCTACTGATAA  
 GCAGCTCATTTAACTTATACACACTCATCACAATGCAAGAATTCCTCTGACTGCTCCT  
 ACCGTCATGGCCCCTAGCCATAATAT

**>CHR 5 NT\_034772.5 1804907-1804321**

CATTTTTCTCTTCACTGTAGGTGGCCTAACCGGCATTGTATTAGCAA ACTCATCATT  
 GATATCATACTACACGATACTACTACGTCGTAGCTCACTTCCATTACGTTCTATCAA  
 TAGGAGCTGTATTCGCCATCATAGGGGGTTTTATCCACTGATTCCCTCTGTTCTCAGG  
 TTACTACTTAGACCAAACCTATGCCAAAATTCATTTTGCTATCATGTTCAATTGGTGTA  
 AATCTAACTTTCTTCCCACAACACTTTCTTGGCCTATCTGGAATACCCCAACGTTACT  
 CGGACTACCCCGATGCATACACCACATGAAATATTCTATCATCTGTAGGCTCATTTA  
 TTTCCCTAACAGCAGTAATACTAATAATTTTTATAATTTGAGAAGGCTTCGCTTCAA  
 ACGAAAAGCCCTAATAATCGAACAACCTCCACCAACCTGGAGTGGCTATATGGAT  
 GCCTTCCACCCTATCATACGTTTCGAAGAACCCATATACATAAAACCTAGACGAAAA  
 AGGAAGGAATGAAACCTCCTAAAGCTGGTTTCAAGCCAACCCACAGCCTCTATGA  
 CTTTTTCAAAAAGA

**>CHR 5 NT\_034772.5 1803025-1802466**

AACTATCTATAAACCTAGCCATGGCCATCCCCCTGTGAACAGGTACAGTAATTACAG  
 GCCTTCGCTCTAAAACCAAAAATGCCCTAGCCCATCTCCTACCACAGGGCACACCTG  
 CACCCCTTATTCCCATATTAATCATTATTGAAACCATCAGCCTACTTATTCAACCAGT  
 AGCCCTAGCCGTACGCCTAACTGCTAACATCACTGCAGGCCACCTACTTATGCACTT  
 AATTGGAAGTGCCACACTAGCAATATCAACTGTTAACCTCCCCCTCAACGCTCATCAT  
 CTCATAATCCTAATTCTATTA ACTATTCTAGAAATCGCTGTTGCCCTAATCCAAGCC  
 TACGTTTTTACTTCTAGTGAGCCCCTACCTACACGACAACACATAATGGCCCACC  
 AATCACATGCCTACCATATAGTAAAACCCAGCCCATGACCCCTAACGGGGGCCCTCT  
 CAGCCCTCCTGATAACCTCTGGCTTAGCCATATGATTCCACTTCTATTCCACAACCT  
 ACTCACACTAGGCCTACTAACCAACGCGCTAACCATATACCAAT

**>CHR 5 NT\_034772.5 1802573-1801994**

CCCTCTCAGCCCTCCTGATAACCTCTGGCTTAGCCATATGATTCCACTTCTATTCCAC  
 AACCTACTCACACTAGGCCTACTAACCAACGCGCTAACCATATACCAATGGTGACG  
 TGATGTAATGCGAGAAAGCACGTACCAAGGCCACCACACACCACCCATCCAAAAG  
 GTCTCCGATATGGAATAGTCCAATTTATCGCCTCAGAAATCTTCTTCTTCGCCAGATT  
 TTTCTGAGCTTTCTACCATTCCAGCCTAGCCCCTACCCCCCAACTAGGAGGACACTG  
 ACCTCCAACAGGCATCACCCCACTGAACCCCAAGTCCCCTTCTGAACACATCC  
 GTACTACTCGCATCAGGAGTCTCAATCACTTGAGCCCACCACAGCCTAATAGAAAAT  
 AATCGAAACCAAATAATTCAAGCGTACTTATTACAATTTTACTAGGTGTTTACTTTA  
 CCCTCCTACAAGCCTCAGAGTATTTTCGAAACGCCCTTTACCATCTCTGACGACGGCA

TCTATGGCTCAACATTTTTTTGTAGCCACAGGCTTTCACGGACTCCACGTCATCATTGG  
ATCAACT

**>CHR 5 NT\_034772.5 1802112-1801539**

TCCTACAAGCCTCAGAGTATTTTCGAAACGCCCTTTACCATCTCTGACGACGGCATCT  
ATGGCTCAACATTTTTTTGTAGCCACAGGCTTTCACGGACTCCACGTCATCATTGGATC  
AACTTTCCTCACTATTTGCCTCATCCGCCAACTAACATTTCACTTTACATCTAAACAT  
CACTTCGGCTTTGAAGCCGCCGCTGGTACTGACACTTCATAGATGTAGTCTGACTA  
TTTCTATACGTCTCAATCTACTGATGAGGATCCTACTCTTTTAGTATAAACAGTACCG  
TTAACTTCCAATTAAGTAGTTTTGATGATATTCAAAAAAGAGTAATAAACTTCGCCC  
TAATTCTAATAGTCAATACCCTCCTAGCCCTACTATTAATAGTTATTACATTCTGATT  
ACCACAACCTCAACAGTTACATAGAAAAATCCAACCCTTACGAATGTGGCTTCGACCC  
CCTATTCCCCACCCGCATTTCCTTTCTCCATGAAATTCTTCTTAGTAGCCATCACCTTT  
CTATTATTTGACCTAGAAATTGCTCTCCTACTGCCCTTACCATGAGCCCTACAAAC

**>CHR 5 NT\_034772.5 1801633-1801071**

CCTTTCTCCATGAAATTCTTCTTAGTAGCCATCACCTTTCTATTATTTGACCTAGAAA  
TTGCTCTCCTACTGCCCTTACCATGAGCCCTACAAACAACCAACTTACCACTAACAG  
TCATATCATCCCTCTTATTAATCATTATCCTAACCTAAGCCTAGCCTACGAATGATC  
ACAAAAGGGATTAGACTGAGCCGAATTGGTACATAGTTTAAATAAAAACGAATGATT  
TCGACTGATTAATATGATAGTCATATTTACCAAATGCCCTTATTTATATAAATAT  
TATACTAGCATTACTATCTCACTTCTAGGAATATTAGTATACCGCTTACACCTGATA  
TCCTCCCTACTATGTCTAGAAGGAATAATATTGTCATTATTTATTATGGCTACTCTCA  
TAACCCTTAACACCCACTCCCTCTTAGCCAACATCGTGCCTATCACCATATTAGTCTT  
TGCTGCCTGCGAGGCAGCAGTAGGCCTAGCCCTACTAGTTTCAATCTCCAACACATA  
CGGCTTGACTACGCCCATAACCTAAACCTACTCCAATGCTAAAA

**>CHR 5 NT\_006713.14 30541827-30541277**

AACTGGGATTAGATACCCCACTATGCTTAGCCCTAAACTTCAACAGTTAAATTAACA  
AAACTGCTCGCCAGAACAACACTACGAGCCACAGCTTAAACTCAAAGGACCTGGCGGT  
GCTTCATATCCCTCTAGAGGAGCCTGTTCTGTAATCGATAAACCCCGATCAACCTCA  
CCACCTCTTGCTCAGCCTATATACCGCCATCTTCAGCAAACCCTGACGAAGGCTGCA  
AAGTAAGCGCAAGTACCCACGTAAAGATGTTAGGTCAAGGTGTAGCCCATGAGCTG  
GCAAGAAATGGGCTACATTTTCTACTTCAGAAAACCTACGATAACCCTTATGAAATTT  
AAGGGTCGAAGGTGGATTTAGCAGTAAACTAAGAGTAGAGTGCGTAGTTGAACAGG  
GCCCTGAAGCGCGTACACACCCGCCGTCACCCTCCTCAAGTATACTTCAAAGGACAT  
TTAACTAAAACCCCTGCGCATTATATAGAGGAGATAAGTCGTAACATGGTAAGTGT  
ACTGGAAAGTGCCTTGGACGAACCAGAGTGTTAGCTTAACA

**>CHR 5 NT\_034772.5 36678748-36678073**

CCTACTCCAATGCTAAAACCTAATTGTCCCAACAATTATATTACTACCACTGACATGA  
CTCTCCAAAAACACATAATTTGAATCAACACAACCACTCACAGCCTAATTATTAGC  
ACCATCCCCCTACTATTTTTCAACCAAATCAACAACAACCTATTTAGCTGCTCCTTAT  
CCTTCTCCTCCGACCCCTAACGACCCCTCCTAATACTAACTACCTGACTCCTGCC  
CCTCACAATCATGGCAAGCCAACGCCACTTATCCAATGAACCACTATCACGAAAAA  
AACTCTACCTCTCTATACTAATCTCCCTACAAATCTCCTTAATTATGACATTCACAGC

CATAGAACTAATCATATTTTATATCTTCTTCGAAACCACACTTATCCCCACCCTGGCT  
 ATCATACCCGATGAGGCAACCAACCAGAACGCCTGAACGCAGGTACATACTTCT  
 ATTCTACACCCTAGTAGGCTCCCTCCCCCTACTCATCGCACTAATCTACACCCACAA  
 CACCCTAGGCTCACTGAATATTCTATTACTCACTCTTACTGCCCAAGAACTATCAAA  
 CTCCTGAGCCAATAACTTAATATGGCTAGCGTACACAATAGCTTTTATAGTAAAAAT  
 ACCTCTTTACGGTCTCCACCTATGGCTCCCTAAAGCCCATGTCTGAAG

**>CHR 5 NT\_034772.5 36678265-36677713**

CCCCTACTCATCGCACTAATCTACACCCACAACACCCTAGGCTCACTGAATATTCTA  
 TTACTCACTCTTACTGCCAAGAACTATCAAACCTCCTGAGCCAATAACTTAATATGG  
 CTAGCGTACACAATAGCTTTTATAGTAAAAATACCTCTTTACGGTCTCCACCTATGG  
 CTCCTTAAAGCCATGTCTGAAGCCCCATCGCTGGGTCAATAGTACTTGCTGCAGTA  
 CTCTTAAAATTAGGCGGCTATGGTATAATACGCCTCACACTCATTCTCAACCCCCTG  
 ACAAACATATAGCCTACCCCTTCTTGTACTATCCCTGTGAGGCATAATTATAACA  
 AGCTCCATCTGCCTGCGACAAACAGACCTAAAATCGCTCATTGCATACTCTTCAATC  
 AGCCACATAGCCCTCGTAGTAACAGCCATCCTCATCCAAACCCCCTGAAGCTTCACC  
 GGCGCAGTCATTCTCATAGTCGCCACGGACTTACATCCTCATTACTATTCTGCCTAG  
 CAAACTCAAACCTACGAACGTACCCACAGTCGCATCATAA

**>CHR 5 NT\_034772.5 36677848-36677294**

GTAACAGCCATCCTCATCCAAACCCCCTGAAGCTTCACCGGCGCAGTCATTCTCATA  
 GTCGCCACGGACTTACATCCTCATTACTATTCTGCCTAGCAAACCTCAAACCTACGAA  
 CGTACCCACAGTCGCATCATAATTCTCTCTCAAGGACTTCAAACCCTACTCCCCTA  
 ATAGCCTTTTGATGACTTCTAGCAAGCCTCACTAATCTCGCCTTACCCCCCTACTATTA  
 ACCTACTAGGAGAACTCTCTGTGCTAGTAACCACATTCTCCTGATCAAATATCACTC  
 TCCTACTTACAGGACTCAACATACTAATCACAGCCCTATACTCCCTCTACATATTTAC  
 CACAACACAATGAGGCTCGCTCAGCCACCACATTAACAACATAAAACCCCTCATTCA  
 CACGAGAAAACACTCTCATGTTTACATACCTATCCCCTATCCTCCTCCTATCCCCTCAA  
 CCCCATATCATTACCGGGTTTTCTCCTGTAAATATAGTTTAACCAAACATCAGA  
 TTGTGAATCTGACAACAGAGGCTCACGACCCCTTATTTAC

**>CHR 5 NT\_034772.5 1799998-1799633**

TGGCAAGCCTCGCCAACCTCGCTTTGCCCCCCACCATTAACCTACTAGGAGAACTCT  
 TCGTACTAGTGACCTCATTCTCCTGATCAAACATCACCCCTCCTACTCACAGGACTTA  
 ACATACTAATCACAGCCCTATACTCCCTCTATATATTTACCACAACACAATGAGGCT  
 CGCTCACACACCACATTAACAACATAAAACCCCTCACTTACACGAGAAAACACTCTC  
 ATATTCATACACCTATCCCCATCCTCCTCCTATCCCTTAACCCTGATATCATTACCG  
 GTTTTACCTCCTGTAAATATAGTTTAACCAAACATCAGATTGTGAATCTGATAACA  
 GAGGCTCACAGCCCCTTATTTACC

**>CHR 5 NT\_034772.5 36677381-36676818**

CATTACCGGGTTTTCTCCTGTAAATATAGTTTAACCAAACATCAGATTGTGAATCT  
 GACAACAGAGGCTCACGACCCCTTATTTACCGAGAAAGCGCATAAGAAGTACTGCTAAC  
 TCATATCCCCATGTCTAACAACATGGCTTTCTCACTTTTAAAGGATAACAGCCATC  
 CGTTGGTCTTAGGCCCAAAAATTTTGGTGCAACTCCAAATAAAAGTAATAACCATG  
 TACGCTACTATACCCACCCTAGCCCTAACTTCTTAATTCCCCCTATCCTTACCACC

TCATTAACCCTAATAAAAAAAAAACTCATATCCCCATTAAGTAAAATCCATTATCGCAT  
 CCACCCTTGTTATTAGTCTCTTCCCCACAACAATATTCATATACCTAGACCAAGAAGT  
 CATTATCTCAAACCTGACACTGGGCAACAACCCAAACAACCCAACTCTCCCTAAGCTT  
 CAAACTAGATTATTTCTCCATAATATTTATCCCTGTAGCACTGTTTCGTTACGTGATCC  
 ATCATAGAATTCTCACTATGATATATAAGCTCAGACCCAAACATTAAT

**>CHR 5 NT\_034772.5 1799289-1798769**

CAAACAATACAACCTCTCGCTAAGCGTTAAACTAGACTATTTCTCCATAATATTAATC  
 CCTGTAGCACTATTCGTCACATGATCCATCATAGAATTCTCACTATGGTATATAAGCT  
 CAGACCCAAACATTAATCAATTTTTCAAGTATCTGCTTATTTTCTAATCACCATACT  
 AATCCTAGTTACAGCTAACAACCTATTCCAACCTTTCATCGGCTGAGAGGGCGTAGG  
 GATTATATCCTTCTTACTCATTAGCTGGTGGTATGCTCGAACAGATGCCAACACAGC  
 AGCCGTCCAAGCAATCCTATACAACCATATTGGTGACATCAGCTTCATCCTAGCCCT  
 AGCATGATTTTTCTTACTCCAACCTCATGAGAACCACAACAATATTCCTCTTAAG  
 TGCTAACCCCAACCTTATCCCCTACTAGGTTTCTCCTAGCAGCAGCAGGAAAATC  
 AGCTCAACTAGGCCTTACCCCTGACTCCCCTCAGCCATGGAAGGCCCTACCCCTGT  
 CTCAGC

**>CHR 5 NT\_034772.5 36676591-36676006**

TACTCTCCAACTCATGAGACCCACAACAATAACCCTCCTAAGTGCTAATCCAAGCC  
 TCACCCCACTACTAGGCTTCTCCTAGCAGCAGCAGGCAAATCAGCTCAATTAGGCC  
 TTCACCCCTGACTCCCCTCAGCCATAGAAGGCCCCACCCCTGTCTCAGCCCTACTCC  
 ACTCAAGCACTATAGTTGTAGCAGGAGTCTTCTACTCATCCGCTTCCACCCCTAG  
 CAGAGAATAACCCACTAATCCAACTCTCACACTATGCCTAGGCGCTATCACCCTC  
 TGTTTCGCAGCAGTCTGCGCCCTTACACAAAATGACATCAAAAAAATCGTGGCCTTCT  
 CCACTTCAAGCCAACTAGGACTTATAATAGTCACAATCGGCATCAACCAACCACACC  
 TAGCATTCTGCACATCTGTACCCACGCCTTCTTCAAAGCCATACTATTTATATGCTC  
 CGGATCCATCATCCACAACCTCAACAATGAACAAGATATTCGAAAAAATAGGAGGAC  
 TACTCAAACCATACTTACTTCAACCTCCCTCACCATTGGCAACCTAGCATTGG  
 CAGGAATACCCTTCT

**>CHR 5 NT\_034772.5 1798931-1798346**

TACTCTCCAACTCATGAGAACCACAACAATAATTCCTCTTAAGTGCTAACCCCAACC  
 TTATCCCCTACTAGGTTTCTCCTAGCAGCAGCAGGAAAATCAGCTCAACTAGGCC  
 TTCACCCCTGACTCCCCTCAGCCATGGAAGGCCCTACCCCTGTCTCAGCCCTACTCC  
 ACTCAAGCACCATAGTTGTAGCTGGGGTCTTTCTACTCATCCGCTTCCACCCCTAGC  
 AGAAAATAGCCCGCCAACCCAAACCCTCACACTATGTTTAGGCGCTATAACTACCCT  
 ACTCGCAGCAGTCTGCGCCCTCACACAAAATGATATCAAAAAAATCGTGGCCTTCTC  
 TACTTCAAGCCAATTGGGACTCATAATAGTCACAATCGGCATCAACCAGCCATACT  
 AGCATTCTACACATCTGTACCCACGCCTTCTTCAAAGCCATGCTATTTGTATGCTCC  
 GGATCCATTATCCATAACCTCAACAATGAACAAGACATTCGAAAAAATAGGAGGACT  
 ACTCAAACCTATAACCCTCACTTCAACCTCCCTCACCATTGGCAGCCTAGCACTTGC  
 AGGAATACCCTTCT



**>CHR 5 NT\_023148.12 2217633-2218198**

AATTAGGACTCATGGTAGTCACAATCGGCATCAACCAACCATACCTAGCATTTCCTAC  
 ACATCTGTACCCATGCTTTCTTCAAAGCCATATTATTTATATGCTCCGGATCCATTAT  
 TCATAACCTCAACAATGAACAAGACATTCGAAAAATAGGAGGACTACTCAAATA  
 TACCCCTCACTTCAACCTCCCTCACCATTGGCAGCCTGGCACTTGCAGGAATGCCCT  
 TCCTCACGGGCTTCTATTCCATAGACCTCATCATCAAACCGCAAATATATCATAACA  
 CCAACGCCTGAGCCCTATCTATTACTCTCATCGCCACTTCCCTAACAAGCGCCAATA  
 GCACTCGAATAATTCTCCTCACCCTAACAGGCCAACCTCGTTTCCCAACCCTAACCA  
 ACATCAACGAAAACAACCCTACCCTGCTAAGCCCCATCAAACGCCTAACAAATCGGA  
 AGCCTATTCGCAGGATTTCTCATCACCAGCAACATTTTCCCCACATCCATCCCCCAA  
 ATGACAATCCCCTTCACTTAAAACCTCACAGCCCTAGGCATCACCTTCCTAGGA

**>CHR 5 NT\_023148.12 2217748-2218306**

TCATAACCTCAACAATGAACAAGACATTCGAAAAATAGGAGGACTACTCAAATA  
 TACCCCTCACTTCAACCTCCCTCACCATTGGCAGCCTGGCACTTGCAGGAATGCCCT  
 TCCTCACGGGCTTCTATTCCATAGACCTCATCATCAAACCGCAAATATATCATAACA  
 CCAACGCCTGAGCCCTATCTATTACTCTCATCGCCACTTCCCTAACAAGCGCCAATA  
 GCACTCGAATAATTCTCCTCACCCTAACAGGCCAACCTCGTTTCCCAACCCTAACCA  
 ACATCAACGAAAACAACCCTACCCTGCTAAGCCCCATCAAACGCCTAACAAATCGGA  
 AGCCTATTCGCAGGATTTCTCATCACCAGCAACATTTTCCCCACATCCATCCCCCAA  
 ATGACAATCCCCTTCACTTAAAACCTCACAGCCCTAGGCATCACCTTCCTAGGACTT  
 CTGACAGCCCTAGACCTCAACTACTTAAACCAACAACTCAAATAAAAAACCCACT  
 GTGTACATTTCACTTTTCCAACATACTCGGATTCTATCCCTGTATTATT

**>CHR 5 NT\_023148.12 2218266-2218823**

CACCGCACAATCCCCACCTAAGCCTTCCCATAAGCCAAAATTTATCCCTACTTTTAT  
 TAGACCTAACTTGACTAGAAAACTAATACCTAAAACAACCTCACAGTACCAAACC  
 TCCGCCTCCATCATCACCTCAACTCAAAAAGGCATAATCAAACCTTTACTTCCTTTTC  
 TTCTTCCCCTCCTCCTAACCCTCCTCCTAATCACATAACCTGTTACCCCGAGCACTC  
 TCAATTACAATATATACACCAACAAACAAGGTTCAACCAGTAACTACCACCAATCA  
 ATGCCCGTAATCGTATAAAGCCCCGCACCAATAGGATCCTCCCGAATCAATGCTGG  
 CCCCTCCCCTTCATAAATTATTCAACTTCCCTACACTATTTAAATTCACCACAATCACC  
 ACCCATCATATTTTTTTACCATAAACAATAACCCCACTTCTATTGCTAATCCCCTA  
 AAACACTTACCAAGACCTCAATCCCTGACCCCATGCCTCAGGATACTCCTCAATAG  
 C

**>CHR 5 NT\_034772.5 36675175-36674964**

TTTACCACAACCACCACCCCATCACTCTTTCACCCATAACACTAATCCTACTTCCA  
 TCACCAACCCCACTAAAACACTTACCAAGACCTCAACCCCTGACCCCATGCCTCAG  
 GATACTCCTCAATAGC

**>CHR 5 NT\_034772.5 1797474-1796796**

CACTAACCCCTACCTCCATCGCTAACCCCACTAATACACTTACCAAGACCTCAATCCC  
 TGACCCCATGCCTCAGGGTACTCCTCAATAGCTATCGCCATAGTATACCCAAAAAC  
 GACCATTATACCCCTAAATAAATTTTAAAAAACCTTAAACCTATATAACCTCCCC  
 CATAATTTAAATAATAACACACCCAACCACCACTAACAAATCAACACTAAACCC

CCATAAATAGGAGAAGGCTTAGAAGAAAACCCACAAACCCCACTTACTAAACCCAC  
 ACTCCATAAAAATAAAGCATATGTCATTATTCTCGCACGGACTACAACCGTGACCAA  
 TGATATGAAAAACATCATTGCATTTCAACTACAAGAACACTAATGACCCCAACAC  
 GAAAAATCAACCCGTTAATAAAATTAATCAACCACTCATTTATTGACCTTCCCCTC  
 CATCCAATATCTCCACATGATGGAACCTTCGGCTCATTTCTTGGCGCCTGCCTAATCCT  
 CCAAATCATCACAGGACTATTCCCTAGCCATACTACTCACCAGACGCTTCAACTGC  
 CTTCTCATTGATCGCCACATCACCCGGGACGTGAACTATGGCTGAATTATCCGCTA  
 CCTCCACGCTAACGGAGTCGCAATATTCTTCATCTGCCTCTTCTACACATCGG

**>CHR5 NT\_034772.5 36675134-36674448**

CACTAATCCTACTTCCATCACCAACCCCACTAAAACACTTACCAAGACCTCAACCCC  
 TGACCCCATGCCTCAGGATACTCCTCAATAGCCACCGCTGTAGTATATCCAAAAC  
 AACCATCATTCCCCCAATAAATTAAAAAAACCATTAACCCATGTAAACCTCCCC  
 GTAATTCAGAATAATAACACACCCAATCACACCACTAACAATCAATACTAAACCCC  
 CATAAATAGGAGAAGGCTTAGAAGAAAACCCACAAACCCCACTTACTAAACCCACA  
 CTCAACAGAAATAAAGCATAACATCATTATTCTTGCACGGGCTACAACCACGACCAAT  
 GATATGAAAAACCATCATTGTATTTCAACTACAAGAACACTAATGACCCCAATACGC  
 AAAATTAACCCCTTGATAAAATTAATTAACCGCTCATTTATCGACCTCCCCACCCA  
 TCCAATATCTCCGCATGATGAAACTTCGGCTCACTTCTTGGTGCCTGCCTAATCCTCC  
 AAATCACACAGGACTATTCCCTAGCCATACTACTCACCAGACGCTTCAACCGCCT  
 TCTCATCGATCGCCCATATCACCCGAGACGTAAATTATGGCTGAATCATCCGCTACC  
 TTCACGCCAATGGCGCCTCAATATTCTTCATCTGCCTCTTCTACACATCGGCCGAGG  
 CCT

**>CHR 5 NT\_006713.14 30541398-30540846**

CCTCAAGTATACTTCAAAGGACATTTAACTAAAACCCCTGCGCATTTATATAGAGGA  
 GATAAGTCGTAACATGGTAAGTGTACTGGAAAGTGCCTTGGACGAACCAGAGTGT  
 AGCTTAACATAAAGCACCCAACCTTACACTTAGGAGATTTCAACTCAACTTGACCACT  
 CTGAGCTAAACCTAGCCCCAAACCCATTCCACCTTACTACCAACAACCTTAACCAA  
 ACCATTTACTCAAATAAAGTATAGGCGATAGAAATTGTAAACCGGCGCAATAGATA  
 TAGTACCGCAAGGGAAAGATGAAAAATTATAACCAAGCATAATATAGCAAGGACTA  
 ACCCTGTACCTTCTGCATAATGAATTAAGTAACTAGAAATAACTTTGCAAAGAGAACCAA  
 AGCTAAGACCCCGAAACCAGACGAGCTACCTAAGAACAGCTAAAAGAGCATAACCC  
 GTCTATGTAGCAAATAGTGGGAAGATTCATAGGTAGAGGCGACAAACCTACCGAG  
 TCTGGTGTAGCTGGTTGTCCAAGATAGAATCTTAGTTCAACTTT

**>CHR 5 NT\_023148.12 2219715-2220144**

TACACGAAATAGGATCAAACAATCCCTTAGGCATCCCCTCCCATTCGACAAAATTA  
 CCTTCCATCCTTACTACACAACCAAAGACATCCTAGGCCTATTCTTTTCTCCTCAC  
 CCTATTAACACTAGTACTATTCTCACCAGACCTCCTGGGCGACCCAGACAACCTACAC  
 CCTGACTAACCCCTAAACACCCACCCACATCAAACCCGAATGATATTTCTTATT  
 CGCCTACGCAATTCTCCGATCCATTCCCAATAAACTAGGAGGCATTCTAGCCCTTCT  
 ACTATCCATCCTCATCCTAGCAGCAATTCTATACTCCACATATCCAACAACAAG  
 CATAATATTTACCCATTAAGCCAATTCTATATTGATTCTAGCCACAGACCTTCTT  
 ACCCTAACCTGAATTGGAGGACAACCAAGT

**>CHR 5 NT\_006713.14 30540924-30540284**

AAGATTCATAGGTAGAGGCGACAAACCTACCGAGTCTGGTGATAGCTGGTTGTCCA  
 AGATAGAATCTTAGTTCAACTTTAAATTTACCCACAGAACCCTCCAAATCCCCCTGT  
 AAATTTAACTGTTAGTCCAAAGAGGAACAGCTCTTTGGACACTAGGAAAAAACCTT  
 GTAAAGAGAGTAAAAAATTTAATACCCATAGTAGGCCTAAAAGCAGCCACCAATTA  
 AGAAAGCGTTC AAGCTCAACACCTATCATCCGAAAAATCCCAAACATATGACTGAA  
 CTCCTTGCACCCAATTGGACCAATCTATTACCTTATAGAAGAATAACGTTGGTATA  
 AGTAACATGAAAGCATTCTCCTCCACATAAGCCTACATCAGACCAAATATTTAACT  
 GACAATTAACAGCCTAATATCTACAACCAACCAACAAGCCATTATTACCCCCACTGT  
 TAACCCAACACAGGCATGCCACAAGGAAAGGTTAAAAAAGTAAAAGGAACTCG  
 GCAAACCTTACCCACCTGTTTACCAAAAACATCACCTCTAGCATTATCAGTATTAG  
 AGGCACCCCTGCCCGGTGACATATGTTTAAACGGCCGCGGTACCCTAACCGTGCAA  
 GGTAGCATAATCACTTGTTC

**>CHR 5 NT\_023148.12 2220042-2220364**

TATCCAAACAACAAGCATAATATTTACCCATTAAGCCAATTCCTATATTGATTCC  
 TAGCCACAGACCTTCTTACCCTAACCTGAATTGGAGGACAACCAGTGAACCTACCCCT  
 TCACTACCATCGGACAAGTAGCATCCGTACTATACTTCACGACAATTTTAACTCTCA  
 TACCAGCCACCTCCTCAATCGAAAATAAAATACTCAAATGGACCTGCCCTGTAGTA  
 TAAACCAATACACCGGTCTTGTAACCTGGAATGAAGACTTCCTTCCAAGGACAAAT  
 CAGAGAAAAAGTACTTGACTTCACCATCAGCACCCAAA

**>CHR 7 NT\_079592.1 56744603-56744909**

TTGCCATGACCCCTAACAGGCATTTCTCCCCTTGACCCTCTGGAAGTACTCCTCCCG  
 AATACATCTGTATTACTTGCATCAGGGGTTTCAATTACCTGAGCCCATCACAGCCTA  
 ATAGAAAATAATCGAAAACAATAATTCAAGCACTACTTATCACAATTACCTTACGT  
 ATTTACTTCACCCTCCTACAAGTCTCAGAATACTCTGAGGCTCCCTTTGCTATTTCTG  
 ATGGAATTTATGGCTCAACATTCTTTACACCTACAGGCTTTCACGGACTTCACATCGT  
 TATGGGATCAACATTCCTCACTATCTG

**>CHR 8 NT\_023678.15 902509-901844**

AGCACACCCGTCTATGTAGCAAAATAGTGGGAAGATTCATGAGTAGTGGTGACAAG  
 CCTACCAAGCCTGGTAACAGCTGATTGTTTTCAACTTTAACTTACCCACAGACTTA  
 CTTAATCTCCCTGTAACCTTTAAGTGTTAGTCTAAAGAGGGACAGCTCTTTAGACATT  
 AGGAAACAACCTGTCTACAGGGAATAAAAAATATCACCACCATAGTTGGCATATAT  
 GGCCAAAAGCAGCCACCAATTAAGAAAGCGTTC AAGCTCAACATCTAATTATCTA  
 AAATTCTAATCATCCTACTGAACTCCTAACATCACATTGGACTAATCTATTACTTAAT  
 AGAACCAGTAATGTTAATATAAGTAACATGAAGATATTCTCCATTGCATAAGCTTAT  
 ATCAGACCCCAATAATCCACTGACAGTTAACAGCCTAATATTAATAAGCAATATAAT  
 AAACACCCTATTATTTATACTGTTAATCCAACACAGGTATGCTCTAAGGAAAGATTA  
 CAAAACTAAAAGGAACTCTGCAAGTCTTACCCTGCCTGTTTACCAAAAACATCACC  
 TCTAGCATTACGAGTATTAGAGGCACTGCCTGCCAGTGACATATGTTCAATGGCCG  
 CAGTATCCTGACAGTGCAAAGGTAGCATAATCACTTGTTC

**>CHR 9 NT\_008470.17 2194293-2194999**

TTCCCTACTAGTCTCAATCTCCAACGCATAAGGCCTAGACTATGTACAAAATCTAAA  
 TTTACTCCAAGCCAAAAATTATTATTCCAACAATTATACTGTTACAATATAACTCTC  
 CAAAACTCTATAGTCTGAATATAGCTACTCATAGCCTATTCATCAGCCTCATTACC  
 CTATTATTTTTTAATCAACCAAACAATAATTCATCTAACTTCTCATTAACTTTTTCTTC  
 TGACGCATTAACATCACCTCTTCTAATCCAAACAGCCTGACTACTACCTCTTATAATC  
 CTAGCAGGCCAACATCACCTATCTAATGAATCACCTTATGGAAAAAACTCCGTAT  
 TTCCAAATTAATTTTCTACAACCTTTTTTAAATTACAGCATTACAGCCACAGAACTA  
 GTCATACTTTACATTCTTTTCGAAGCTACACTCATCCCTACCCTAATCATTATTACCT  
 GCTGAGGTAACCAACCAGAATGCCTAATGCAAGCTCATACTTATTTTACACACTAGT  
 AGGATCCCTTCCCTTACTTATTACACTCATCCACACCTGAAATAGCTCAGGTTCACTA  
 AATATCCTAATAATAATGTTTACTAATCAAGAACTATTAACCTTCTGATCTAACAAC  
 CTTATATGACTAGCATGTATTATGGCTTTTATAGTAAAAATACCCCTATACGGACTTC  
 ACCTATGACTCCCTAAAGCCCATGTCGAAGAAGCCGAATTCTGCAGATATCCATCAC  
 ACTGGCGGCCGCTCGAGCATGCATCTAGAGGGCCCAATTGCCCTATAGTAGTCGTT

**>CHR 11 NT\_009237.17 9317709-9317035**

AGAGCACACCCGTCTATGTAGCAAAATAGTGGGAAGATTCGTAGGTAGAGGCGACA  
 AACCTACCGAGTCTGGTGATAGCTGGTTGTCCAAGACAGAATCTTAGTTCAACTTTA  
 AATTTACCCACAGAACCCTCCAAATCCCCCTGTAAATTTAACTGTTAGTCCAAAGAG  
 GAACAGCTCTTTGGACACTAGGAAAAAACCTTGTAAAGAGAGTAAAAAATTTAATA  
 CCCACAGTAGGCCTAAAAGCAGCCACCAATTAAGAAAGCGTTCAAGCTCGACACCT  
 GTCATCTAAAAAATCCCAAACACATAACTGAACTCCTTGCACCCAATTGGACCAATC  
 TATTACCCTATAGAAGAGCTAATGTTAGTATAAGTAAACATGAAAACATTCTCCTCCG  
 CATAAGCCTACATCAGACCAAAATATTAACCTGACAATTAACAGCCCAATATCTATA  
 ACCAACCAACAAGCCATTATTACCCCCACTGTTAACCCAACACAGGCATGCCACA  
 AGGAAAGGTTAAAAAAGTAAAAGGAACTCGGCAAATCTTACCCCGCCTGTTTACC  
 AAAACATCACCTCTAGCATTCTCAGTATTAGAGGCACCGCCTGCCAGTGACATGC  
 GTTTAACGGCCGCGGTACCCTAACTGTGCAAAGGTAGCATAATCACTTGTTCC

**>CHR 11 NT\_009237.17 9318994-9318400**

AGGTTTGGTCCTAGCCTTTCTATTAGCTCTTAGTAGGATTACACATGCAAGCATCCCC  
 GCCCAGTGAGTCACCCTCTAAATCACACGATCAAAGGAACAGGTATCAAGCAC  
 GCAGCAACGCAGCTCAAACGCTTAGCCTAGCCACACCTCCACGGGAGACAGCAGT  
 GATAAACCTTTAGCAATAAACCAAAGTTTAACTAAGCCATACTAACCCAGGGTTGG  
 TCAATTTTCGTGCCAGCCACCGCGGTCACACGATTAACCCAAGTCAATAGAAACCGG  
 CATAAAGAGTGTTTTAGATCAATTCCCCTCAATAAAGCTAAAATTCACGTGAGTTGT  
 AAAAACTCCAGTTGATACAAAATAAACTACGAAAGTGGCTTTAATGCATCTGAAC  
 ACAGAATAACTAAGACCCAACTGGGATTAGATACCCCACTATGCTTAGCCCTAAA  
 CTCAACAGTTAAATTAACAAAACCTGCTCGCCAGAACACTACGAGCCACAGCTTAA  
 AACTCAAAGGACCTGGCGGTGCTTCATATCCCTCTAGAGGAGCCTGTTCTGTAATCG  
 ATAAACCCCGATCAACCTCACACCTCTTG

**>CHR 11 NT\_009237.17 9318585-9318008**

GACCCAAACTGGGATTAGATACCCCACTATGCTTAGCCCTAACTTCAACAGTTAAA  
 TTAACAAAACCTGCTCGCCAGAACACTACGAGCCACAGCTTAAAACCTCAAAGGACCT

GGCGGTGCTTCATATCCCTCTAGAGGAGCCTGTTCTGTAATCGATAAACCCCGATCA  
 ACCTCACCACCTCTTGCTCAGCCTATATACCGCCACCTTCAGCAAACCCTGACGAAG  
 GCCGCAAAGTAAGCGCAAGTACCCACGTAAGACGTTAGGTCAAGGTGTAGCCCAT  
 GAGGTGGCAAGAAATGGGCTACATTTTCTACTTCAGAAAACCTACGATAACCCTGATG  
 AAATTTAAGGGTTCGAAGGTGGATTTAGCAGTAACTAAGAGTAGAGTGCTTAGTTG  
 AACAGGGCCCTGAAGCGCGTACACACCGCCCGTCACCCTCCTCAAGTATACTTCAA  
 GGACACTTAACTAAAACCCTACGCATTTATATAGAGGAGATAAGTCGTAACATGGT  
 AAGTGTACTGGAAAGTGCACCTTGGACGAACCAGAGTGTAGCTTAACACAAAGCACC  
 CAACTTACACTT

**>CHR 11 NT\_009237.17 9318150-9317598**

CCTCAAGTATACTTCAAAGGACACTTAACTAAAACCCTACGCATTTATATAGAGGA  
 GATAAGTCGTAACATGGTAAGTGTACTGGAAAGTGCACCTTGGACGAACCAGAGTGT  
 AGCTTAACACAAAGCACCCAACTTACACTTAGGAGATTTCAACTCAACTTGACCGCT  
 CTGAGCCAAACCTAGCCCCAAACCATTCCACCTTACTACCGAACAGCTTTAACCAA  
 ATCATTTACCCAAATAAAGTATAGGCGATAGAAATTGTAAATCGGCGCAATAGATA  
 TAGTACCGCAAGGGAAAGATGAAAAATTGCAACCAAGCATAATACAGCAAGGACTA  
 ATCCCTGTACCTTCTGCATAATGAATTAAGTAACTAGAAATAACTTTGCAAAGAGAACCAA  
 AGCTAAGACCCCCGAAACCAGACGAGCTACCTAAGAACAGCTAAAAGAGCACACCC  
 GTCTATGTAGCAAAATAGTGGGAAGATTCGTAGGTAGAGGCGACAAACCTACCGAG  
 TCTGGTGATAGCTGGTTGTCCAAGACAGAATCTTAGTTCAACTTT

**>CHR 16 NT\_037887.4 3360917-3360343**

TTCTTAACAATATGCCTATAATCAATCTTCTCCTACTTATTATTACCACTTTAATCGCT  
 ATAGTATTCCTTACACTCATTGAATGAAAACCTCTTAGGCTACACACAATTACGCAA  
 GGACCTAACATTGTAGGTCCCCATGGACTGCTTCAACCATTTCGCTGATGCAATAAAA  
 CTTTTCGTCAAAGAACCCTTACGTCCCTCAGCGTCTACTATTACCTTTTATACTACTG  
 CTCCAACCCTAGCTGTTTTGATCGCTCTCCTCTTGTGAACCTCCCCTCCGCATACCAGA  
 TGCTCTAATTAATTTAATATAGGCCCTCCTATTTATACTAGCCACATCAAGCCTAGCC  
 ATCTACTCTATCCTATGATCAGGATGAGCATCTAATTCAAATTACGCACTAATCGGC  
 ACATTACAAGCTGTAGCCAGACAATTCATATGAAGTCACTCTAGCCATTATCCTT  
 TTATCAGTTCTACTAATAAGTGGCTCATTTAACTTACATGCATTTATCACAAACGCAAG  
 AATTCCTCTGACTGCTTCTACCATCATAACCCTAGCCATAATATGATTTATCTCC

**>CHR 17 NT\_024862.13 336116-336858**

GGCCGAGGGCTGTAATATGGCTTATTTCTCTACCTAGAAACCTGAAACATTGGCATC  
 ATTCTCCTACTCACAACCATAGCAACAGCCTTCATAGGCTAGGTACTCCCATGAGGC  
 CAGATATCCTTGAGGGGCCACGGTAATCACAAATCTACTGTCCGCCATTCCTTATGT  
 CGGAACAGACCTGGTGCAGTGGGTTTGAGGTGGTTATTCAGTAGACACACCCACTCT  
 CACACGATTCTTCACCTTCCACTTTATCCTACCTTTTATTATTACAGCCCTAGTAGTC  
 TTACACCTACTATTTCTCCATGAGACAGCATCAAATAACCCTCAGGAATCTCCTCC  
 CACTCCAACAAAATTACCTTCCACCCCTACTACATGACCAAAGATATCCTAGGCCTA  
 TTTCTCCTCCTTCTCACCTAATAACACTAGTACTGTTTTACCCGACCTCCTAACTG  
 ATCCAGATAACTACACCCTAGCCAACCGCCTGAATACTCCACCCCATATTAACCCG  
 AATGGTATTTTCTATCTGCCTACGCAATCTTATGATCCATCCCCAACAACTAGGAG  
 GCGTACTGGCCCTCCTACTATCAATCCTCATCCTAGCAGCAATTCCCACACTTCACAT

GTCCAAACAACAAAGCATAATATTCTGTCCACTAAACCAATTCCTATATTGACTCCT  
AATTACAGATCTCCTTATCCTCACATGGGTT

**>CHR 17 NT\_024862.13 336858-337463**

TTCATCACCTTCGGACAAACAGCATTTCGTAGTTTACTTTGCTACAATTCTAGCCCTGA  
TACCGCTTGCCTCCCTACTCGAAAACAAAATACTCAAATGGACCTGCCCTTGTAGTA  
TAAACCAATATATTGGTCTTGTAACCAGAAATGGAGACTCTCTCCAAGGACAAC  
CAGAGAAAAAGTACTTGACTTCACCATCAGCACCCAAAGCTAAGATTCTAATTTAAA  
CTACTCTCTGTATTCTCATGAGGGAGCCATTTTGGGTACAACCCAAGTATCGACCCA  
CCCCACCATAATTTTATATATATCGTGAATTTCTGCTAGCCACCATGAATATTATATA  
GTACTATAATTGCTTAACTGTACATAGTACATATCAAACGAACTCAACAACAAC  
CTCCCCACGACGCTTACAAGCAAGGACTAGAATACCTTAACTAACGGTAACACATT  
AAACCCACCCTCCAAAAGAACTTCTCAACCACAAGCGTACCAAAAAACACTATAT  
ATCCTTGAGTACATAGTACATCTAATCGCTCATGGTAGATAGCACATTCCAGTTAAA  
CAAGTCCTCGTCAATACGGATATCCCCCTCAGATAG

**>CHR 17 NT\_024862.13 337395-338087**

ATCGCTCATGGTAGATAGCACATTCCAGTTAAACAAGTCCTCGTCAATACGGATATC  
CCCCTCAGATAGTGGTCCGTTGTTACCATCCTCTGTGAAATCAATATCCTGCAGAA  
GAGTGCTACTCTTCTTGATCCAGGTCCATAATACTTGGGGGTAGCTATAATGAACTG  
TATCCGGCATCTTGTTCTTACCTCACAGCCATAAAGTCAAGACCAACCACACGTTCC  
CCTTAAATAAGACATCACGATGGATCACGGGTCTATTACCCTATTAATCAGTCACGG  
GAGCTCTCCATGCATTTGGTATTTAATCTGGGGGGTGTGCACGCGATAGCATTGTG  
AAACGCTGGCCCCAGAGCACCCATGTGCGAGTGTCTGTCTTTGATTCCCTGCCCCAT  
CCCATTATTGATCACACCTACATTCAATATCCCAGGCGAGCATACTATCACAAGGT  
GTTAATTAATTAATGCTTGTAGGACATAACAATCAGTAAACACACCCACGGCCGCTT  
TTCACATCAACTCTACAATAAAATTCTGCAAATCCCCTTCCCCCATCTTTGGCCTCAC  
CAACCCAGGAAAAGACATCTTTGCCAAACCCCAAAAACAAAAGCCTTAATCCAAC  
TCAACCAGAGCCCAAATTTTATCTTTAGGCTGTACGCATTTTAAACAGTCACCCCTC  
AACTAACA

**>CHR 17 NT\_024862.13 339611-340281**

GAGCACACCCGTCTATGTAGCAAATAGTGGGAAGATTCATAGGTAGAGGTGACAA  
GCCTACCGAGCCTGGTGATAGCTGGTTGTCCAAGATAGAATCTTAGTTCAACTTTAA  
ATTTATCTACAGAACCAGCTAATGCCTTTGTAAATTTAACTGTTAGTCTAAAGAGGG  
ACAGCTCTTTAGACACTAGGAAAAAACCTTGTAGAGAGAGTAAAAAATATAACTTC  
CAAAGTTGGCCTAGAAGAAGCGATCAATTAAGAAGGCGTTCAAGCTCAACACCCAA  
CCACCCAAAAAATTCCAAACACATAACTGAACTCCTCACATCACATTGGACCAATCT  
ATCATTTTCATAGAAGAAATAATGTTAGTATAAGTGACATGCAAACATTCTCCTCCGC  
ATAAGCCTACATCAGACCAAATACTTCACTGACAATTAACAGCCCAATATCTATAA  
ATAATCAATGAAACCATTATTACCCACACTGTTAACCCAACACAGGCATGCTTACAA  
GGAAAGGTTAAAAAAGTAAAAGGAACTCAGCGAATCTTACCCCTCCTGTTTATCA  
AAAACATCACCTCTAGCATTACCAGTACTAGAGGCACCACCTGCCAGTGACATATG  
TTAATGGCTGCGGTACCCTAACCGTGCAAAGGTAGCATAATCACTTG

**>CHR 17 NT\_024862.13 340090-340749**

CACTGTAAACCCAACACAGGCATGCTTACAAGGAAAGGTTAAAAAAGTAAAAGGA  
ACTCAGCGAATCTTACCCCTCCTGTTTATCAAAAACATCACCTCTAGCATTACCAGT  
ACTAGAGGCACCACCTGCCAGTGACATATGTTTAATGGCTGCGGTACCCTAACCGT  
GTAAAGGTAGCATAATCACTTGTTCCTTAAATAGGGACTTGTCTGAATGGCTCCACG  
AGGGTTCAGCTGTCTCTTACTTTCAACCAGTGAAATTGACCTGCCCGTGAAGAGGCG  
GACATAATACAACAAGACGAGAAGACCCTAAGGAGCTTTAATTTATGAATGCAAAC  
AAGACCAAATAGGCCCGCAGGCCCTAAACTACCAGACCTGCGTTAAACATTTTCGGT  
TGGGGCGACCTCGGAGTATAACCTAACCTCCGAGCAACATATGCTGAGACTATAACC  
AGTCAAGGCGAATATCCACATACAATTGACCCAATAATTTGACCAACGGAACAAGT  
TACCCTAGTGATAACAGTACAATCCTATTCTAGGGTCCACATCGACAGTAGCATTAA  
CGACCTCGATGTTGGATCAGGACATCCCAATGGTGCAGCCGCTATTAAAGGTTTCGTT  
TGTTCAACGATTAGAGTCCTATGTGATCTGAGTTCAGA

**>CHR 17 NT\_0248612.13 340743-341346**

GTTCAGACCGGAGTAATCCAGGTTGGTTTCTATCTATTCTACATTTCTTCCAGTACGA  
AAGGATAAGAGAAATGGGGCCCACTTCATAAAGTGCCCCTGCCCCATAGATGATAT  
TATCTCAGCATTTTACTGTACCCACACCCACCCAAGAACAGGGTTTGTAAAGATGGC  
AGACCCAGCAATTGCATAAAATTTAAAACCTTTACAACCAGAGGTTCAACCCCTCTT  
CTTAACAACATGTCCATAACTAACCTTCTACTTCTTATTGTACCTATCCTAATCGCCA  
TGGCATTCTTCATGCTAACTGAATGAAAAATCCTAGGCTACATGCAACTACGCAAAG  
GGCCAATATTGTAGGCCCTATGGACTATTACAACCTTTTGCCGATGCCATAAAAC  
TCTTTACCAAAGAATCCTTAAAACCCTCAACGTCAACTGTTACCCTCTACATCACTG  
CCCCAACCTTAGCCCTCTCTATTGCCCTTCTACTATGAACTCCCCTCCCTATACCTAA  
CCCCCTAGTTAATCTTAACTTAGGCCTTCTATTCACTTCTGGCTACATCCAGCCTAGCT  
GTCTACTCTATCCTATGATCAGGATGAGCAT

**>CHR 17 NT\_024862.13 341020-341543**

TAATCGCCATGGCATTCTTCATGCTAACTGAATGAAAAATCCTAGGCTACATGCAAC  
TACGCAAAGGGCCCAATATTGTAGGCCCTATGGACTATTACAACCTTTTGCCGATG  
CCATAAACTCTTTACCAAAGAATCCTTAAAACCCTCAACGTCAACTGTTACCCTCT  
ACATCACTGCCCCAACCTTAGCCCTCTCTATTGCCCTTCTACTATGAACTCCCCTCCC  
TATACCTAACCCCTAGTTAATCTTAACTTAGGCCTTCTATTCACTTCTGGCTACATCC  
AGCCTAGCTGTCTACTCTATCCTATGATCAGGATGAGCATCAAACCTCAAACCTATGCC  
CTGATCGGCGCATTATGAGCAGTTGCCCAAACAATTCATACGAAGTTACCCTAGCT  
ATCATCCTATTATCGATCCTACTAATAAGTGGCCAATTCAATCTCTGCACCCTCATT  
GAACACAAGAACACCTCTGACTACTCCTAACATCATGACCCCTAGCTATAATATGAT  
TTATTTCC

**>CHR 17 NT\_010718.15 19103293-19103865**

GAATTCCTCTGACTGCTCCTACCATCATGCCGCCTAGTCATAATATAATTTATCTCCC  
CACTAGCAGAACTAACCGAGCCCTTTTGACCTAACAGAAGGAGAGTCAGAGTTA  
GTCTCAGGCTTCAACATTGAATATGCCACAGGTTCAATTTGCCCTCTTCTTTATGGCAG  
AATACATGAATATTATCTTAAATAAGTGCCCTAACTACTACTGTTTTCTAGGAGCACT  
ACACACTATATATTCACCAGAACTCTATACCACAAATTTCAATTATCAAGACCCTCGT  
TCTAACCGCCCTGATTTTATGAATTCGAACAGCATACCCCTGACTGTGCTACAACCA

ACTCATATATCTCCTATGAAAAAACTTCCTACCACTTAAACTAGCATTCTGCATATGT  
TATATGGCCTGTCCCTAATTTCCAGCATTCCACCTCAAACATAGGAAATATGTCTGAC  
AAAAGAATTACTTTGATAGAGTAAATAATAGAGGTTAAAATCCTCTTATTTCTAGAA  
CTATAGGAATTGAACCTACCCCTGATAATCCAAAATTCTCCATGCCACCTATTACAC

**>CHR 17 NT\_024862.13 341489-342064**

ACACCTCTGACTACTCCTAACATCATGACCCCTAGCTATAATATGATTTATTTCCACA  
CTAGCAGAAACCAATCGAGCTGCTTTTGACCTTACTGAAGGAGAATCAGAACTAGTC  
TCAGGCTTCAACATTGAATATGCTGCAGGCCCATTCGCCCTATTCTTTATAGCCGAAT  
ACATAAATATCATTAAAATAAATGCCCTAACTGCCATAATCTTCCTAGGTACAATAT  
ATAATATTCACCTACCAGAACTCTACACAATATGCTTCACCATTAAAACCCTATTCTT  
AACCTCTCTATTTTTATGAATCCGAACAGCATAACCCCGATTCCACTACGATCAACT  
CATGTATCTCTTATGAAAAAATTTCTTACCATTTACTAGCACTACTTATATGATAC  
ATCTCAATATCCGCTACAATTTCCAACATTCCCCCCTAAACTTAAGAAATATGTCTG  
ACAAAAGAGTGACTTTGATAGAGTAAATAATAGAGGTTTGAATCCTCTTATTTCTAG  
GACCATAGGAATTGAACCTATCCCTGAGAATCCAAAATTCTCCGTGCCACGTGTCAC  
AC

**>CHR 17 NT\_024862.13 338011-338489**

CTTAATCCAACCTCAACCAGAGCCCAAATTTTTATCTTTAGGCTGTACGCATTTTTAAC  
AGTCACCCCTCAACTAACACGTCTTTTTCCCTCTTAGCCTCACTTCACAGACTCTACA  
AATTTAGTTATCCCTTTTTTCAGCCATCCCATTCAACGCATGCCCGACCACTACTAAC  
CAACACCCTAAACTAACCCAACCCCAAAGGCAAGGCTTTCCCCCCTACCCATTGCTT  
GTATGCCCATCCCTAGCCTTGCTTACACTGTGCAATCACAGTCTATGTAGCTTAATG  
ACCCAAAGCAAGACTGAAAATATCTAGATGGGCCTACACTGCCCATAGACAAA  
TAGGTTTGGTCCTAGCCTTTCTATTAACCTTTAGTAAGATTACACAAGCAAGCATCG  
CCACCCTGGTGAAATAACCCTCTAAATCACTACAATCAAAGGAGTAAGTATCAAG  
CACGCATTAGTGCAGCTCAA

**>CHR 17 NT\_024862.13 343174-343794**

TCATATAAATTTATGTTAAACGCAGACTAAGAGCCTTCAAAGCCCTTAGTAAGTTAA  
TAATACTTAATTTCTGCAGCACCCAAGGACTGCAAACCCCTACTTTGCATCTACTGA  
ACGCAAATCAGCCACTTTAATTAAGCTAAGCCCTTGCTAGATCAATGGGACTTAAAC  
CCACAAAAATTTGGTTAACAGCTAAATACCTTAATCAACTGGCTTCAATCTACTTCT  
CCCGCCGCAAGGGAAAAAAGGCGGGAGAAGCCCAGGCAGGATTGAAGCTGCTTCTT  
TGAATTTGCAATTCAACATGAAAGGCACCTCAGGGCTGGTAAAAAGAGAGTTTTTA  
GATTTACAGTCTAATGCTTTGCTCAGCCATCTTACCCACTAATGTTTCGCCAACCGCTG  
ACTATTCTCAACAAATCATAAAGATATCGGAACACTATATTTATTGTTTGGTGCATG  
AGCTGGAGTCTTGGGCACAGCCTTAAGCCTCCTTATTCAGACTGAACTAGGTCAACC  
TGGCAACCTTCTAGGTAACGACCACATCTACAACGTCATCGTCACAGCCACACATT  
CTTCATAATCTTTTTCATAGTAATGTCTATCATAATCGGAGGCTTTGGCAA

**>CHR 20 NT\_011362.9 20987219-20986564**

CACTGTTAACCCAACACAGGCATGCTCTAAGGAAACATTACAAAAAATAAAAGGA  
ACTCAGCAAATCTTACCCCGCCTGTTTACCAAAAACATCACCTCTAGCATTACCAGT  
ATTAGAGGCACTATCTGCCAGTGACATATATTCAACAGCTGTGGTATCCTGACCGT



GCGAAGGTAGCATAATCACTTGTTCTCTAAATAGGGACTTGAATGAATGGCCACACG  
AAGGTTCAAGCTGTCTCTTACTTTCAACCAGTGAAATTGATCTATCCGTGAAGAGGCG  
GATATAAACAAATAAGACGAGAAAACCTTATGGAGCTTTAATTCATCAATGCAAAT  
AAAAACTCCAACAAGCCTACAGGCCCTAGCCTCCTATCCCTGCATTA AAAAATTTTGG  
TTGGGGTGACCTCGGAGCATAATTCAACCTCCTAACAAACACCTAAGACCACACAAG  
TCTAAGTGAGTTATTACACATCGACCCAATAATTTGATAAACGGAGTAAGTTACCCT  
AGGGATAACAGCGCAATCCTATACTAGAGTCCATATCGACAATAGAGTTTACGACCT  
CGATGTTGGATCAGGACATCCTAATGGTGTAGCCGCTATTAAGAGTTTGTGTTTCA  
ATGATTAAAGTCCTATGTGATCTCAGTTCAGACC

**>CHR X NT\_011630.14 2761822-2761281**

TTCTCCTACTTATTATCCCTACTTTTCATCGCTATAGCATTCCTTACACTCATCGAATG  
AAAAATCTTAGGCTACATACAACTACGCAAAGGACCTAACATTGTAGGTCCCTACG  
GGCTGCTTCAACCATTTCGCTAACGCAATAAACTTTTCACCAAAGAACCCTTACAGC  
CCTCAACATCTACTATTACCCTTTATATTATTGCTCCAATCCTAGCCCTTCCTATCGA  
TCTCCTCTTATGAACTCCCCTCCCTATACCAAATCCTCTAATTAATTTAACATAGGC  
CTCCTATTTATACTAGCCATATCAATCCTAGCCATTTATTCTATGATCAGGATGAGCA  
TCTAATTCAAAATATGCACTAATTGGCGCATCACGAGCTGTGGCCCAGACAATTTCA  
AATGAGGTCACCCTAGCCATTATCCTGTTATCAGTTTTACTGATAAGTGGTTCATTTA  
ACTTATATGCATTCATCACAATGCAAGAACTCCTCTGACTGCTCCTACCATCATTACC  
CCTAGCCATAATGTGATTTATCCCC
